# Supplementary material for: Is the Bulbar Urethral Stricture a Single and Uniform Disease?
Source: MDPI journal article supplement (doi:10.3390/siuj5020014), 2024-04-04
Supplement: s1 [file s1]

523 patients

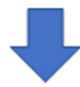

Exc. Penile urethral stricture

393 patients

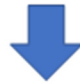

Exc. PFUI

220 patients

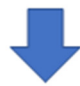

Exc. Multiple stricture

204 patients

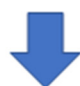

Exc. Perineal urethrotomy

196 patients

Figure S1. Patient selection process.
